# Supplementary material
Source: PubMed Central journal article supplement (PMC5860327)
Supplement: kwx238prenticewebmaterialfinal.pdf [file kwx238prenticewebmaterialfinal.pdf]

**Web Table 1.** Baseline<sup>a</sup> Characteristics for Participants (N=85,850) in the Women’s Health Initiative Dietary Modification Trial Comparison Group and Observational Study, Enrolled During 1994-1998, by Quartile of the Calibrated Ratio of Sodium to Potassium Intake

|                                                   |                          | Quartile of the Calibrated Ratio of Sodium to Potassium Intake |                |                 |                |                 |                |                 |                |
|---------------------------------------------------|--------------------------|----------------------------------------------------------------|----------------|-----------------|----------------|-----------------|----------------|-----------------|----------------|
|                                                   |                          | 1 <sup>st</sup>                                                |                | 2 <sup>nd</sup> |                | 3 <sup>rd</sup> |                | 4 <sup>th</sup> |                |
|                                                   |                          | (N=21463)                                                      |                | (N=21462)       |                | (N=21462)       |                | (N=21463)       |                |
|                                                   |                          | %                                                              | N <sup>b</sup> | %               | N <sup>b</sup> | %               | N <sup>b</sup> | %               | N <sup>b</sup> |
| Age (years)                                       | 50-59                    | 28.1                                                           | 6,035          | 31.3            | 6,719          | 32.1            | 6,888          | 38.5            | 8,263          |
|                                                   | 60-69                    | 44.3                                                           | 9,514          | 45.5            | 9,762          | 46.1            | 9,887          | 45.8            | 9,838          |
|                                                   | 70-79                    | 27.4                                                           | 5,881          | 23.1            | 4,957          | 21.7            | 4,656          | 15.6            | 3,338          |
|                                                   | 80-85                    | 0.2                                                            | 33             | 0.1             | 24             | 0.1             | 31             | 0.1             | 23             |
| BMI (kg/m <sup>2</sup> )                          | Normal (< 25.0)          | 61.9                                                           | 13,278         | 44.7            | 9,602          | 30.6            | 6,575          | 14.6            | 3,141          |
|                                                   | Overweight (25.0 - 29.9) | 30.3                                                           | 6,502          | 38.1            | 8,168          | 39.4            | 8,460          | 31.0            | 6,658          |
|                                                   | Obese (≥ 30)             | 7.8                                                            | 1,683          | 17.2            | 3,692          | 29.9            | 6,427          | 54.3            | 11,664         |
| Recreational physical activity (MET – hours/week) | < 1.5                    | 10.0                                                           | 2,149          | 14.0            | 3,000          | 20.2            | 4,328          | 29.9            | 6,422          |
|                                                   | 1.5 - 6.2                | 16.2                                                           | 3,468          | 20.3            | 4,352          | 22.7            | 4,880          | 25.8            | 5,542          |
|                                                   | 6.3 – 14.7               | 27.2                                                           | 5,843          | 27.5            | 5,904          | 26.7            | 5,729          | 22.9            | 4,915          |
|                                                   | > 14.8                   | 46.6                                                           | 10,003         | 38.2            | 8,206          | 30.4            | 6,525          | 21.4            | 4,584          |
| Race                                              | White                    | 92.7                                                           | 19,897         | 91.5            | 19,632         | 87.8            | 18,837         | 65.8            | 14,130         |
|                                                   | Black                    | 0.5                                                            | 106            | 1.8             | 377            | 4.6             | 987            | 23.7            | 5,088          |
|                                                   | Hispanic                 | 0.9                                                            | 196            | 2.0             | 439            | 3.2             | 677            | 7.3             | 1,557          |
|                                                   | Other Minority           | 5.9                                                            | 1,264          | 4.7             | 1,014          | 4.5             | 961            | 3.2             | 688            |

|                                                    |                           |      |        |      |        |      |        |      |        |
|----------------------------------------------------|---------------------------|------|--------|------|--------|------|--------|------|--------|
| Income (total yearly)                              | < \$20,000                | 9.6  | 2,051  | 11.3 | 2,424  | 14.8 | 3,166  | 21.9 | 4,700  |
|                                                    | \$20,000 - \$34,999       | 20.5 | 4,391  | 22.7 | 4,872  | 24.9 | 5,337  | 25.0 | 5,368  |
|                                                    | \$35,000 - \$49,999       | 25.2 | 5,400  | 21.7 | 4,657  | 19.5 | 4,192  | 16.5 | 3,539  |
|                                                    | \$50,000 - \$74,999       | 12.8 | 2,740  | 20.1 | 4,318  | 24.1 | 5,169  | 26.6 | 5,718  |
|                                                    | \$75,000 +                | 32.1 | 6,880  | 24.2 | 5,188  | 16.8 | 3,596  | 9.9  | 2,135  |
| Education                                          | < High school diploma/GED | 0.9  | 191    | 2.1  | 440    | 3.9  | 848    | 9.5  | 2,030  |
|                                                    | High school diploma/GED   | 4.1  | 873    | 11.6 | 2,492  | 20.5 | 4,403  | 28.8 | 6,181  |
|                                                    | School after high school  | 19.2 | 4,122  | 36.6 | 7,849  | 45.8 | 9,835  | 46.6 | 10,007 |
|                                                    | College degree or higher  | 75.8 | 16,277 | 49.8 | 10,681 | 29.7 | 6,376  | 15.1 | 3,245  |
| Cigarette smoking                                  | Current                   | 6.7  | 1,435  | 6.0  | 1,287  | 5.7  | 1,228  | 6.0  | 1,289  |
|                                                    | Past                      | 41.9 | 8,990  | 43.1 | 9,243  | 42.8 | 9,194  | 42.0 | 9,018  |
|                                                    | Never                     | 51.4 | 11,038 | 50.9 | 10,932 | 51.4 | 11,040 | 52.0 | 11,156 |
| Premature family history of cardiovascular disease | Yes                       | 15.1 | 3,241  | 17.2 | 3,684  | 18.1 | 3,872  | 20.1 | 4,324  |
| Hypertensive <sup>c</sup>                          | Yes                       | 29.8 | 6,386  | 34.1 | 7,313  | 38.6 | 8,292  | 48.6 | 10,421 |
| Treated diabetes                                   | Yes                       | 1.3  | 288    | 1.9  | 404    | 3.3  | 710    | 7.2  | 1,543  |
| Current statin use                                 | Yes                       | 5.4  | 1,160  | 6.6  | 1,409  | 7.0  | 1,509  | 7.9  | 1,705  |
| Current daily aspirin use (≥80 mg)                 | Yes                       | 8.0  | 1,715  | 15.9 | 3,416  | 22.9 | 4,913  | 30.4 | 6,518  |
| Postmenopausal hormone use                         | Current user              | 51.8 | 11,125 | 50.6 | 10,863 | 48.7 | 10,450 | 40.7 | 8,737  |
|                                                    | Never used                | 35.0 | 7,502  | 36.1 | 7,739  | 37.4 | 8,023  | 45.2 | 9,702  |
|                                                    | Past user                 | 13.2 | 2,836  | 13.3 | 2,860  | 13.9 | 2,989  | 14.1 | 3,024  |

|                                                                       |                                 |      |       |      |       |      |       |      |       |
|-----------------------------------------------------------------------|---------------------------------|------|-------|------|-------|------|-------|------|-------|
| Postmenopausal hormone treatment in the WHI hormone trial (DM-C only) | Estrogen placebo                | 1.8  | 63    | 2.3  | 110   | 3.2  | 187   | 5.2  | 353   |
|                                                                       | Active estrogen                 | 1.4  | 48    | 2.3  | 113   | 3.1  | 182   | 5.5  | 375   |
|                                                                       | Estrogen plus progestin placebo | 3.4  | 117   | 4.4  | 213   | 4.6  | 269   | 5.5  | 374   |
|                                                                       | Active estrogen plus progestin  | 3.7  | 129   | 4.4  | 214   | 5.0  | 294   | 5.5  | 378   |
|                                                                       | Not randomized                  | 89.7 | 3,108 | 86.6 | 4,193 | 84.1 | 4,937 | 78.4 | 5,363 |

|                           |                  | <b>GM</b> | <b>(2.5, 97.5)<br/>Percentile</b> |
|---------------------------|------------------|-----------|-----------------------------------|-----------|-----------------------------------|-----------|-----------------------------------|-----------|-----------------------------------|
| Calibrated Intake         | Sodium/potassium | 0.77      | (0.48, 1.13)                      | 0.94      | (0.63, 1.38)                      | 1.07      | (0.71, 1.55)                      | 1.27      | (0.82, 1.97)                      |
| Distribution <sup>d</sup> | Sodium (mg/d)    | 2110.0    | (957.9, 4170.2)                   | 2400.1    | (1088.5, 4787.8)                  | 2567.7    | (1137.2, 5271.8)                  | 2753.8    | (1136.2, 6186.0)                  |
|                           | Potassium (mg/d) | 2738.9    | (1375.6, 5096.4)                  | 2549.1    | (1226.4, 4787.5)                  | 2409.9    | (1109.8, 4677.2)                  | 2165.3    | (900.9, 4612.7)                   |

Abbreviations: BMI, body mass index (weight (kg)/height(m)<sup>2</sup>; GM, geometric mean; METs, metabolic equivalent units;

<sup>a</sup>Baseline refers to one year post-randomization in the DM-C and enrollment in the OS.

<sup>b</sup>Number of participants for whom there were no missing values for the nutrients regression calibration or for hypertension or cardiovascular event analysis. Women with missing data on hypertension status or hypertension treatment are excluded.

<sup>c</sup>Baseline hypertension was defined as systolic blood pressure >140 or diastolic blood pressure >90, or taking anti-hypertension medication.

<sup>d</sup>Numbers shown are the geometric mean, and the sample 2.5 – 97.5 percentile for calibrated intake.

**Web Table 2.** Calibration Equation<sup>a</sup> from Linear Regression of Biomarker Log(sodium/energy) on Self-reported Log(sodium/energy) and Other Characteristics in the Women’s Health Initiative Nutrition and Physical Activity Assessment Study, Enrolled During 2007-2009 (N=340)

|                                                   | Estimate | SE                 | R <sup>2</sup> | Adjusted R <sup>2</sup> |
|---------------------------------------------------|----------|--------------------|----------------|-------------------------|
| (Intercept)                                       | 0.271    | 0.087 <sup>b</sup> |                |                         |
| Log(sodium/energy) Self-Report <sup>c</sup>       | 0.384    | 0.099 <sup>b</sup> | 4.2            | 22.3                    |
| Age (years) <sup>c</sup>                          | 0.0002   | 0.003              | 0.001          | 0.01                    |
| Body Mass Index (kg/m <sup>2</sup> ) <sup>c</sup> | -0.001   | 0.003              | 0.02           | 0.1                     |
| Race (vs. White)                                  |          |                    | 0.7            | 3.7                     |
| Black                                             | 0.033    | 0.059              |                |                         |
| Hispanic                                          | 0.024    | 0.065              |                |                         |
| Other Minority                                    | -0.133   | 0.108              |                |                         |
| Dietary Supplementation (0 - no, 1 - yes)         | -0.047   | 0.038              | 0.2            | 0.9                     |
| Current Smoker (0 - no, 1 - yes)                  | -0.13    | 0.115              | 0.05           | 0.3                     |
| Education (vs. <High school diploma/GED)          |          |                    | 2.1            | 11.1                    |
| High school diploma/GED                           | 0.042    | 0.079              |                |                         |
| College degree or more                            | -0.115   | 0.043              |                |                         |
| Family Income (\$ thousands vs. <20)              |          |                    | 0.7            | 3.7                     |
| 20 - 34                                           | 0.056    | 0.085              |                |                         |
| -35 - 49                                          | 0.013    | 0.091              |                |                         |
| 50 - 74                                           | 0.036    | 0.094              |                |                         |
| >75                                               | 0.015    | 0.089              |                |                         |
| Aspirin Use (≥ 80 mg/day) (0 - no, 1 - yes)       | 0.138    | 0.050 <sup>b</sup> | 1.3            | 6.9                     |
| TOTAL                                             |          |                    | 9.2            | 48.9                    |

Abbreviations: R<sup>2</sup>, percent of response variable variation explained; SE, standard error

<sup>a</sup>Calibration equations were developed based on primary and reliability samples together. R<sup>2</sup> and adjusted R<sup>2</sup> were computed using primary, but not reliability sample from the Nutrition and Physical Activity Assessment Study. Adjusted R<sup>2</sup> values are formed by dividing corresponding

$R^2$  values by the estimated correlation between the paired biomarker assessments in the Nutrition and Physical Activity Assessment Study reliability subsample (n=90). Sodium and potassium are measured in units of mg/d.

<sup>b</sup>Significance level  $p < 0.05$

<sup>c</sup>To interpret intercept, note that  $\log(\text{sodium/energy})$  is centered at 0.50; age is centered at 70.9 years; and BMI is centered at 28.2  $\text{kg/m}^2$ .

**Web Table 3.** Calibration Equation<sup>a</sup> from Linear Regression of Biomarker

Log(potassium/energy) on Self-reported Log(potassium/energy) and Other Characteristics in the Women's Health Initiative Nutrition and Physical Activity Assessment Study, Enrolled During 2007-2009 (N=345)

|                                                   | Estimate | SE                 | R <sup>2</sup> | Adjusted R <sup>2</sup> |
|---------------------------------------------------|----------|--------------------|----------------|-------------------------|
| (Intercept)                                       | 0.135    | 0.075 <sup>b</sup> |                |                         |
| Log(sodium/energy) Self-Report <sup>c</sup>       | 0.435    | 0.090 <sup>b</sup> | 7.1            | 16.6                    |
| Age (years) <sup>c</sup>                          | 0.003    | 0.003              | 1.8            | 4.3                     |
| Body Mass Index (kg/m <sup>2</sup> ) <sup>c</sup> | -0.013   | 0.003              | 6              | 14.1                    |
| Race (vs. White)                                  |          |                    | 5.5            | 13                      |
| Black                                             | -0.232   | 0.054 <sup>b</sup> |                |                         |
| Hispanic                                          | -0.097   | 0.046 <sup>b</sup> |                |                         |
| Other Minority                                    | -0.161   | 0.099              |                |                         |
| Dietary Supplementation (0 - no, 1 - yes)         | 0.006    | 0.035              | 0.04           | 0.1                     |
| Current Smoker (0 - no, 1 - yes)                  | 0.017    | 0.102              | 0.02           | 0.05                    |
| Education (vs. <High school diploma/GED)          |          |                    | 0.4            | 0.9                     |
| High school diploma/GED                           | -0.018   | 0.056              |                |                         |
| College degree or more                            | 0.044    | 0.041              |                |                         |
| Family Income (\$ thousands vs. <20)              |          |                    | 2.1            | 4.9                     |
| 20 - 34                                           | 0.031    | 0.072              |                |                         |
| 35-49                                             | -0.015   | 0.074              |                |                         |
| 50 - 74                                           | -0.111   | 0.074              |                |                         |
| >75                                               | -0.043   | 0.076              |                |                         |
| Total                                             |          |                    | 23.0           | 53.9                    |

Abbreviations: R<sup>2</sup>, percent of response variable variation explained; SE, standard error

<sup>a</sup>Calibration equations were developed based on primary and reliability samples together. R<sup>2</sup> and adjusted R<sup>2</sup> were computed using primary, but not reliability sample from the Nutrition and Physical Activity Assessment Study. Adjusted R<sup>2</sup> values are formed by dividing corresponding

$R^2$  values by the estimated correlation between the paired biomarker assessments in the Nutrition and Physical Activity Assessment Study reliability subsample (n=90). Sodium and potassium are measured in units of mg/d.

<sup>b</sup>Significance level  $p < 0.05$

<sup>c</sup>To interpret intercept, note that  $\log(\text{potassium/energy})$  is centered at 0.544; age is centered at 70.9 years; and BMI is centered at 28.2  $\text{kg/m}^2$ .

**Web Table 4.** Calibration Equation<sup>a</sup> from Linear Regression of Biomarker Log(energy) on Self-reported Log(energy) and Other Characteristics in the Women’s Health Initiative Nutrition and Physical Activity Assessment Study, Enrolled During 2007-2009 (N=382)

|                                                   | Estimate | SE                 | R <sup>2</sup> | Adjusted R <sup>2</sup> |
|---------------------------------------------------|----------|--------------------|----------------|-------------------------|
| (Intercept)                                       | 7.599    | 0.029 <sup>b</sup> |                |                         |
| Log(sodium/energy) Self-Report <sup>c</sup>       | 0.070    | 0.015 <sup>b</sup> | 3.7            | 6.1                     |
| Age (years) <sup>c</sup>                          | -0.010   | 0.001 <sup>b</sup> | 17.0           | 28.1                    |
| Body Mass Index (kg/m <sup>2</sup> ) <sup>c</sup> | 0.013    | 0.001 <sup>b</sup> | 19.2           | 31.9                    |
| Race (vs. White)                                  |          |                    | 2.0            | 3.2                     |
| Black                                             | -0.030   | 0.019              |                |                         |
| Hispanic                                          | -0.077   | 0.022 <sup>b</sup> |                |                         |
| Other Minority                                    | -0.047   | 0.032              |                |                         |
| Dietary Supplementation (0 - no, 1 - yes)         | 0.004    | 0.013              | 0.02           | 0.03                    |
| Current Smoker (0 - no, 1 - yes)                  | -0.033   | 0.043              | 0.2            | 0.4                     |
| Education (vs. <High school diploma/GED)          |          |                    | 0.01           | 0.01                    |
| High school diploma/GED                           | 0.013    | 0.025              |                |                         |
| College degree or more                            | 0.015    | 0.015              |                |                         |
| Family Income (\$ thousands vs. <20)              |          |                    | 1.0            | 1.6                     |
| 20 - 34                                           | 0.020    | 0.027              |                |                         |
| 35 - 49                                           | 0.040    | 0.031              |                |                         |
| 50 - 74                                           | 0.005    | 0.029              |                |                         |
| >75                                               | 0.002    | 0.029              |                |                         |
| Aspirin Use (≥80 mg/day) (0 - no, 1 - yes)        |          |                    |                |                         |
| Hypertension                                      | -0.040   | 0.017 <sup>b</sup> | 0.8            | 1.4                     |
| Total                                             |          |                    | 43.9           | 72.7                    |



Abbreviations:  $R^2$ , percent of response variable variation explained; SE, standard error

<sup>a</sup>Calibration equations were developed based on primary and reliability samples together.  $R^2$  and adjusted  $R^2$  were computed using primary, but not reliability sample from the Nutrition and Physical Activity Assessment Study. Adjusted  $R^2$  values are formed by dividing corresponding  $R^2$  values by the estimated correlation between the paired biomarker assessments in the Nutrition and Physical Activity Assessment Study reliability subsample (n=90). Sodium and potassium are measured in units of mg/d.

<sup>b</sup>Significance level  $p < 0.05$

<sup>c</sup>To interpret intercept, note that  $\log(\text{energy})$  is centered at 7.27 with energy in kcal/day; age is centered at 70.9 years; and BMI is centered at 28.2  $\text{kg}/\text{m}^2$ .

**Web Table 5.** Baseline<sup>a</sup> Characteristics for Participants (N=85,850) in the Women’s Health Initiative Dietary Modification Trial Comparison Group and Observational Study, Enrolled During 1994-1998, by Quartile of the Calibrated Sodium Intake

|                                                            |                          | Quartile of the Calibrated Sodium Intake |                |                 |                |                 |                |                 |                |
|------------------------------------------------------------|--------------------------|------------------------------------------|----------------|-----------------|----------------|-----------------|----------------|-----------------|----------------|
|                                                            |                          | 1 <sup>st</sup>                          |                | 2 <sup>nd</sup> |                | 3 <sup>rd</sup> |                | 4 <sup>th</sup> |                |
|                                                            |                          | (N=21463)                                |                | (N=21462)       |                | (N=21462)       |                | (N=21463)       |                |
|                                                            |                          | %                                        | N <sup>b</sup> | %               | N <sup>b</sup> | %               | N <sup>b</sup> | %               | N <sup>b</sup> |
| Age (years)                                                | 50-59                    | 16.8                                     | 3,605          | 28.6            | 6,142          | 36.9            | 7,919          | 47.7            | 10,239         |
|                                                            | 60-69                    | 44.2                                     | 9,493          | 46.7            | 10,023         | 47.2            | 10,128         | 43.6            | 9,357          |
|                                                            | 70-79                    | 38.7                                     | 8,302          | 24.6            | 5,269          | 15.8            | 3,397          | 8.7             | 1,864          |
|                                                            | 80-85                    | 0.3                                      | 63             | 0.1             | 28             | 0.1             | 18             | 0.0             | 2              |
| BMI (kg/m <sup>2</sup> )                                   | Normal (< 25.0)          | 63.1                                     | 13,553         | 45.1            | 9,686          | 30.9            | 6,632          | 12.7            | 2,725          |
|                                                            | Overweight (25.0 - 29.9) | 30.0                                     | 6,448          | 38.9            | 8,344          | 40.5            | 8,686          | 29.4            | 6,310          |
|                                                            | Obese (≥ 30)             | 6.8                                      | 1,462          | 16.0            | 3,432          | 28.6            | 6,144          | 57.9            | 12,428         |
| Recreational<br>physical activity<br>(MET –<br>hours/week) | < 1.5                    | 14.8                                     | 3,183          | 15.6            | 3,351          | 18.2            | 3,896          | 25.5            | 5,469          |
|                                                            | 1.5 - 6.2                | 19.0                                     | 4,087          | 20.8            | 4,459          | 21.4            | 4,596          | 23.8            | 5,100          |
|                                                            | 6.3 – 14.7               | 26.5                                     | 5,683          | 26.9            | 5,763          | 26.7            | 5,739          | 24.3            | 5,206          |
|                                                            | > 14.8                   | 39.6                                     | 8,510          | 36.8            | 7,889          | 33.7            | 7,231          | 26.5            | 5,688          |
| Race                                                       | White                    | 77.0                                     | 16,521         | 86.6            | 18,579         | 88.1            | 18,902         | 86.2            | 18,494         |
|                                                            | Black                    | 6.0                                      | 1,286          | 6.9             | 1,491          | 7.6             | 1,626          | 10.0            | 2,155          |
|                                                            | Hispanic                 | 3.4                                      | 720            | 3.5             | 741            | 3.3             | 699            | 3.3             | 709            |
|                                                            | Other Minority           | 13.7                                     | 2,936          | 3.0             | 651            | 1.1             | 235            | 0.5             | 105            |
| Income (total<br>yearly)                                   | < \$20,000               | 17.4                                     | 3,744          | 14.6            | 3,126          | 13.2            | 2,829          | 12.3            | 2,642          |
|                                                            | \$20,000 - \$34,999      | 16.2                                     | 3,472          | 20.5            | 4,396          | 24.6            | 5,273          | 31.8            | 6,827          |

|                                                    |                           |      |        |      |        |      |        |      |        |
|----------------------------------------------------|---------------------------|------|--------|------|--------|------|--------|------|--------|
|                                                    | \$35,000 - \$49,999       | 18.8 | 4,030  | 20.0 | 4,284  | 21.2 | 4,549  | 22.9 | 4,925  |
|                                                    | \$50,000 - \$74,999       | 21.2 | 4,550  | 21.5 | 4,612  | 21.3 | 4,576  | 19.6 | 4,207  |
|                                                    | \$75,000 +                | 26.4 | 5,666  | 23.5 | 5,042  | 19.7 | 4,230  | 13.3 | 2,861  |
| Education                                          | < High school diploma/GED | 2.4  | 524    | 3.1  | 675    | 4.6  | 983    | 6.2  | 1,327  |
|                                                    | High school diploma/GED   | 6.8  | 1,454  | 11.7 | 2,509  | 17.6 | 3,767  | 29.0 | 6,219  |
|                                                    | School after high school  | 25.4 | 5,441  | 34.4 | 7,392  | 42.0 | 9,011  | 46.4 | 9,969  |
|                                                    | College degree or higher  | 65.4 | 14,044 | 50.7 | 10,886 | 35.9 | 7,701  | 18.4 | 3,948  |
| Cigarette smoking                                  | Current                   | 14.0 | 3,008  | 5.7  | 1,226  | 3.2  | 677    | 1.5  | 328    |
|                                                    | Past                      | 36.9 | 7,912  | 42.0 | 9,013  | 44.3 | 9,501  | 46.7 | 10,019 |
|                                                    | Never                     | 49.1 | 10,543 | 52.3 | 11,223 | 52.6 | 11,284 | 51.8 | 11,116 |
| Premature family history of cardiovascular disease | Yes                       | 14.8 | 3,171  | 16.9 | 3,633  | 18.0 | 3,858  | 20.8 | 4,459  |
| Hypertensive <sup>c</sup>                          | Yes                       | 39.8 | 8,533  | 36.1 | 7,744  | 35.8 | 7,677  | 39.4 | 8,458  |
| Treated diabetes                                   | Yes                       | 2.0  | 431    | 2.4  | 509    | 3.2  | 695    | 6.1  | 1,310  |
| Current statin use                                 | Yes                       | 5.9  | 1,261  | 6.5  | 1,393  | 7.0  | 1,507  | 7.6  | 1,622  |
| Current daily aspirin use (≥80 mg)                 | Yes                       | 6.5  | 1,405  | 13.5 | 2,892  | 21.5 | 4,620  | 35.6 | 7,645  |
| Postmenopausal hormone use                         | Current user              | 47.4 | 10,164 | 48.8 | 10,484 | 49.4 | 10,607 | 46.2 | 9,920  |
|                                                    | Never used                | 38.5 | 8,264  | 37.5 | 8,045  | 37.2 | 7,991  | 40.4 | 8,666  |
|                                                    | Past user                 | 14.1 | 3,035  | 13.7 | 2,933  | 13.3 | 2,864  | 13.4 | 2,877  |
| Postmenopausal hormone treatment                   | Estrogen placebo          | 2.3  | 104    | 3.1  | 158    | 3.1  | 169    | 4.6  | 282    |
|                                                    | Active estrogen           | 2.2  | 99     | 2.4  | 119    | 3.7  | 202    | 4.9  | 298    |

|                                      |                                 |      |       |      |       |      |       |      |       |
|--------------------------------------|---------------------------------|------|-------|------|-------|------|-------|------|-------|
| in the WHI hormone trial (DM-C only) | Estrogen plus progestin placebo | 3.9  | 173   | 4.3  | 218   | 4.6  | 254   | 5.4  | 328   |
|                                      | Active estrogen plus progestin  | 4.4  | 194   | 4.3  | 215   | 4.8  | 261   | 5.7  | 345   |
|                                      | Not randomized                  | 87.1 | 3,862 | 85.9 | 4,333 | 83.8 | 4,592 | 79.3 | 4,814 |

|                           |                         | <b>GM</b> | <b>(2.5, 97.5)<br/>Percentile</b> |
|---------------------------|-------------------------|-----------|-----------------------------------|-----------|-----------------------------------|-----------|-----------------------------------|-----------|-----------------------------------|
| Calibrated                | Sodium/potassium Intake | 0.87      | (0.49, 1.52)                      | 0.96      | (0.58, 1.60)                      | 1.03      | (0.62, 1.67)                      | 1.14      | (0.69, 1.86)                      |
|                           | Sodium (mg/d)           | 2007.2    | (903.3, 4159.6)                   | 2345.3    | (1091.8, 4701.7)                  | 2569.2    | (1201.6, 5103.4)                  | 2960.7    | (1356.1, 6244.9)                  |
| Distribution <sup>d</sup> | Potassium (mg/d)        | 2298.8    | (1009.4, 4514.5)                  | 2434.7    | (1107.4, 4677.5)                  | 2506.4    | (1127.4, 4806.1)                  | 2597.1    | (1151.0, 5114.8)                  |

Abbreviations: BMI, body mass index (weight (kg)/height(m)<sup>2</sup>; GM, geometric mean; METs, metabolic equivalent units;

<sup>a</sup>Baseline refers to one year post-randomization in the DM-C and enrollment in the OS.

<sup>b</sup>Number of participants for whom there were no missing values for the nutrients regression calibration or for hypertension or cardiovascular event analysis. Women with missing data on hypertension status or hypertension treatment are excluded.

<sup>c</sup>Baseline hypertension was defined as systolic blood pressure >140 or diastolic blood pressure >90, or taking anti-hypertension medication.

<sup>d</sup>Numbers shown are the geometric mean, and the sample 2.5 – 97.5 percentile for calibrated intake.

**Web Table 6.** Baseline<sup>a</sup> Characteristics for Participants (N=85,850) in the Women’s Health Initiative Dietary Modification Trial Comparison Group and Observational Study, Enrolled During 1994-1998, by Quartile of the Calibrated Potassium Intake

|                                                            |                          | Quartile of the Calibrated Potassium Intake |                |                 |                |                 |                |                 |                |
|------------------------------------------------------------|--------------------------|---------------------------------------------|----------------|-----------------|----------------|-----------------|----------------|-----------------|----------------|
|                                                            |                          | 1 <sup>st</sup>                             |                | 2 <sup>nd</sup> |                | 3 <sup>rd</sup> |                | 4 <sup>th</sup> |                |
|                                                            |                          | (N=21463)                                   |                | (N=21462)       |                | (N=21462)       |                | (N=21463)       |                |
|                                                            |                          | %                                           | N <sup>b</sup> | %               | N <sup>b</sup> | %               | N <sup>b</sup> | %               | N <sup>b</sup> |
| Age (years)                                                | 50-59                    | 28.4                                        | 6,094          | 25.6            | 5,500          | 32.0            | 6,871          | 44.0            | 9,440          |
|                                                            | 60-69                    | 44.4                                        | 9,519          | 46.9            | 10,068         | 47.2            | 10,127         | 43.3            | 9,287          |
|                                                            | 70-79                    | 27.0                                        | 5,800          | 27.3            | 5,856          | 20.7            | 4,447          | 12.7            | 2,729          |
|                                                            | 80-85                    | 0.2                                         | 50             | 0.2             | 37             | 0.1             | 17             | 0.0             | 7              |
| BMI (kg/m <sup>2</sup> )                                   | Normal (< 25.0)          | 29.9                                        | 6,416          | 36.1            | 7,756          | 39.9            | 8,561          | 46.0            | 9,863          |
|                                                            | Overweight (25.0 - 29.9) | 34.6                                        | 7,431          | 35.3            | 7,572          | 35.3            | 7,580          | 33.6            | 7,205          |
|                                                            | Obese (≥ 30)             | 35.5                                        | 7,616          | 28.6            | 6,134          | 24.8            | 5,321          | 20.5            | 4,395          |
| Recreational<br>physical activity<br>(MET –<br>hours/week) | < 1.5                    | 27.5                                        | 5,906          | 20.4            | 4,383          | 15.3            | 3,294          | 10.8            | 2,316          |
|                                                            | 1.5 - 6.2                | 24.8                                        | 5,316          | 22.9            | 4,914          | 20.4            | 4,373          | 17.0            | 3,639          |
|                                                            | 6.3 – 14.7               | 23.8                                        | 5,113          | 25.7            | 5,512          | 27.7            | 5,955          | 27.1            | 5,811          |
|                                                            | > 14.8                   | 23.9                                        | 5,128          | 31.0            | 6,653          | 36.5            | 7,840          | 45.2            | 9,697          |
| Race                                                       | White                    | 47.1                                        | 10,116         | 92.7            | 19,898         | 98.3            | 21,096         | 99.6            | 21,386         |
|                                                            | Black                    | 28.3                                        | 6,067          | 1.8             | 390            | 0.4             | 84             | 0.1             | 17             |
|                                                            | Hispanic                 | 9.6                                         | 2,070          | 2.7             | 590            | 0.8             | 170            | 0.2             | 39             |
|                                                            | Other Minority           | 15.0                                        | 3,210          | 2.7             | 584            | 0.5             | 112            | 0.1             | 21             |
| Income (total<br>yearly)                                   | < \$20,000               | 24.1                                        | 5,169          | 15.5            | 3,324          | 10.7            | 2,299          | 7.2             | 1,549          |
|                                                            | \$20,000 - \$34,999      | 17.2                                        | 3,688          | 20.6            | 4,414          | 24.6            | 5,289          | 30.6            | 6,577          |

|                                                    |                           |      |        |      |        |      |        |      |        |
|----------------------------------------------------|---------------------------|------|--------|------|--------|------|--------|------|--------|
|                                                    | \$35,000 - \$49,999       | 13.9 | 2,987  | 17.9 | 3,845  | 22.7 | 4,869  | 28.4 | 6,087  |
|                                                    | \$50,000 - \$74,999       | 31.3 | 6,721  | 27.3 | 5,868  | 17.5 | 3,765  | 7.4  | 1,591  |
|                                                    | \$75,000 +                | 13.5 | 2,897  | 18.7 | 4,009  | 24.4 | 5,237  | 26.4 | 5,656  |
| Education                                          | < High school diploma/GED | 8.8  | 1,883  | 4.0  | 858    | 2.3  | 492    | 1.2  | 276    |
|                                                    | High school diploma/GED   | 20.9 | 4,476  | 19.6 | 4,199  | 15.0 | 3,217  | 9.6  | 2,057  |
|                                                    | School after high school  | 43.1 | 9,260  | 42.5 | 9,117  | 36.0 | 7,737  | 26.6 | 5,699  |
|                                                    | College degree or higher  | 27.2 | 5,844  | 34.0 | 7,288  | 46.7 | 10,016 | 62.6 | 13,431 |
| Cigarette smoking                                  | Current                   | 9.1  | 1,944  | 6.4  | 1,381  | 5.1  | 1,094  | 3.8  | 820    |
|                                                    | Past                      | 37.4 | 8,030  | 42.6 | 9,139  | 44.0 | 9,454  | 45.8 | 9,822  |
|                                                    | Never                     | 53.5 | 11,489 | 51.0 | 10,942 | 50.9 | 10,914 | 50.4 | 10,821 |
| Premature family history of cardiovascular disease | Yes                       | 17.3 | 3,704  | 18.4 | 3,943  | 17.7 | 3,807  | 17.1 | 3,667  |
| Hypertensive <sup>c</sup>                          | Yes                       | 51.5 | 11,049 | 41.3 | 8,871  | 33.7 | 7,237  | 24.5 | 5,255  |
| Treated diabetes                                   | Yes                       | 6.0  | 1,288  | 3.2  | 679    | 2.5  | 542    | 2.0  | 436    |
| Current statin use                                 | Yes                       | 7.6  | 1,621  | 7.0  | 1,497  | 6.7  | 1,434  | 5.7  | 1,231  |
| Current daily aspirin use (≥80 mg)                 | Yes                       | 16.1 | 3,465  | 20.7 | 4,440  | 20.7 | 4,437  | 19.7 | 4,220  |
| Postmenopausal hormone use                         | Current user              | 40.7 | 8,741  | 47.8 | 10,261 | 50.3 | 10,789 | 53.0 | 11,384 |
|                                                    | Never used                | 45.0 | 9,664  | 37.8 | 8,107  | 36.2 | 7,777  | 34.6 | 7,418  |
|                                                    | Past user                 | 14.2 | 3,058  | 14.4 | 3,094  | 13.5 | 2,896  | 12.4 | 2,661  |
| Postmenopausal hormone treatment                   | Estrogen placebo          | 4.3  | 282    | 3.4  | 204    | 2.7  | 139    | 2.6  | 88     |
|                                                    | Active estrogen           | 4.8  | 313    | 3.2  | 190    | 2.5  | 130    | 2.5  | 85     |

|                                      |                                 |      |       |      |       |      |       |      |       |
|--------------------------------------|---------------------------------|------|-------|------|-------|------|-------|------|-------|
| in the WHI hormone trial (DM-C only) | Estrogen plus progestin placebo | 4.7  | 303   | 5.1  | 306   | 4.0  | 203   | 4.8  | 161   |
|                                      | Active estrogen plus progestin  | 4.9  | 320   | 4.8  | 289   | 5.1  | 262   | 4.3  | 144   |
|                                      | Not randomized                  | 81.2 | 5,276 | 83.6 | 5,040 | 85.6 | 4,377 | 85.9 | 2,908 |

|                                  |                  | <b>GM</b> | <b>(2.5, 97.5)<br/>Percentile</b> |
|----------------------------------|------------------|-----------|-----------------------------------|-----------|-----------------------------------|-----------|-----------------------------------|-----------|-----------------------------------|
| Calibrated                       | Sodium/potassium | 1.2       | (0.68, 1.97)                      | 1.06      | (0.64, 1.62)                      | 0.95      | (0.60, 1.44)                      | 0.82      | (0.49, 1.25)                      |
| Intake Distribution <sup>d</sup> | Sodium (mg/d)    | 2319.2    | (951.4, 5562.3)                   | 2489.4    | (1094.5, 5326.6)                  | 2501.7    | (1120.1, 5141.1)                  | 2479.3    | (1133.2, 5004.8)                  |
|                                  | Potassium (mg/d) | 1938.7    | (858.5, 4099.3)                   | 2354.0    | (1187.4, 4420.6)                  | 2626.0    | (1379.8, 4706.3)                  | 3040.0    | (1638.4, 5405.0)                  |

Abbreviations: BMI, body mass index (weight (kg)/height(m)<sup>2</sup>; GM, geometric mean; METs, metabolic equivalent units;

<sup>a</sup>Baseline refers to one year post-randomization in the DM-C and enrollment in the OS.

<sup>b</sup>Number of participants for whom there were no missing values for the nutrients regression calibration or for hypertension or cardiovascular event analysis. Women with missing data on hypertension status or hypertension treatment are excluded.

<sup>c</sup>Baseline hypertension was defined as systolic blood pressure >140 or diastolic blood pressure >90, or taking anti-hypertension medication.

<sup>d</sup>Numbers shown are the geometric mean, and the sample 2.5 – 97.5 percentile for calibrated intake.

**Web Table 7.** Hazard ratios (HRs) and 95% Confidence Intervals (CIs) for Simultaneous 20% Increments in Uncalibrated Food Frequency Questionnaire (FFQ) Sodium and Potassium Intake, in Combined Analyses of Data from the Women’s Health Initiative Dietary Modification Trial Comparison Group (DM-C) and Observational Study (OS) from Baseline<sup>a</sup> (1994-1998) to September 30, 2010 (N=93,602)

| Cardiovascular Disease Outcome | Uncalibrated Sodium/Potassium |            | Uncalibrated Sodium |            | Uncalibrated Potassium |            |
|--------------------------------|-------------------------------|------------|---------------------|------------|------------------------|------------|
|                                | HR                            | 95% CI     | HR                  | 95% CI     | HR                     | 95% CI     |
|                                | CHD                           | 1.05       | 1.03, 1.07          | 1.05       | 1.02, 1.07             | 0.94       |
| Non-fatal MI                   | 1.06                          | 1.03, 1.08 | 1.05                | 1.02, 1.08 | 0.94                   | 0.92, 0.97 |
| Coronary death                 | 1.05                          | 1.01, 1.09 | 1.05                | 1.01, 1.09 | 0.93                   | 0.89, 0.97 |
| CABG and PCI                   | 1.06                          | 1.04, 1.09 | 1.06                | 1.04, 1.08 | 0.93                   | 0.91, 0.95 |
| Stroke                         | 1.01                          | 0.99, 1.04 | 1.01                | 0.98, 1.03 | 0.98                   | 0.95, 1.00 |
| Ischemic stroke                | 1.03                          | 1.00, 1.06 | 1.03                | 1.00, 1.06 | 0.96                   | 0.93, 0.99 |
| Hemorrhagic stroke             | 0.93                          | 0.88, 0.98 | 0.92                | 0.87, 0.98 | 1.06                   | 0.99, 1.13 |
| Total CVD                      | 1.03                          | 1.02, 1.05 | 1.03                | 1.01, 1.05 | 0.96                   | 0.94, 0.98 |
| Total CVD with CABG and PCI    | 1.04                          | 1.02, 1.05 | 1.03                | 1.02, 1.05 | 0.95                   | 0.94, 0.97 |
| Heart Failure                  | 1.04                          | 1.01, 1.07 | 1.05                | 1.01, 1.08 | 0.97                   | 0.94, 1.01 |

Abbreviations: CABG, coronary artery bypass graft; CHD, coronary heart disease; CI, confidence interval; CVD, cardiovascular disease; DM-C, dietary modification trial comparison



group; HR, hazard ratio; MI, myocardial infarction; PCI, percutaneous coronary intervention;  
OS, observational study

<sup>a</sup>Baseline defined as 1 year from randomization in the Dietary Modification Trial Comparison  
Group and enrollment in the Observational Study

**Web Table 8.** Cardiovascular disease hazard ratios (HRs) and 95% Confidence Intervals (CIs) for a 20% Increment in the Ratio of Sodium to Potassium Intake in the Women's Health Initiative Dietary Modification Trial Comparison Group (DM-C)

and Observational Study (OS) Separately, With and Without Biomarker Calibration of the Food Frequency Questionnaire (FFQ)-based Dietary Data, from Baseline<sup>a</sup> (1994-1998) to September 30, 2010

| Cardiovascular Disease Outcome | DM-C         |            |            |            | OS           |            |            |            |
|--------------------------------|--------------|------------|------------|------------|--------------|------------|------------|------------|
|                                | Uncalibrated |            | Calibrated |            | Uncalibrated |            | Calibrated |            |
|                                | (N=22678)    |            | (N=21267)  |            | (N=70924)    |            | (N=65177)  |            |
|                                | HR           | 95% CI     | HR         | 95% CI     | HR           | 95% CI     | HR         | 95% CI     |
| CHD                            | 1.05         | 1.00, 1.09 | 1.15       | 1.03, 1.28 | 1.05         | 1.02, 1.08 | 1.12       | 1.03, 1.22 |
| Non-fatal MI                   | 1.05         | 0.99, 1.11 | 1.11       | 0.99, 1.24 | 1.06         | 1.03, 1.09 | 1.13       | 1.04, 1.23 |
| Coronary death                 | 1.06         | 0.97, 1.15 | 1.27       | 1.05, 1.53 | 1.05         | 1.01, 1.10 | 1.13       | 1.00, 1.27 |
| CABG and PCI                   | 1.05         | 1.01, 1.10 | 1.14       | 1.02, 1.26 | 1.07         | 1.04, 1.09 | 1.16       | 1.07, 1.26 |
| Stroke                         | 1.03         | 0.98, 1.09 | 1.08       | 0.96, 1.21 | 1.01         | 0.98, 1.04 | 1.05       | 0.98, 1.12 |
| Ischemic stroke                | 1.04         | 0.98, 1.11 | 1.12       | 0.97, 1.29 | 1.03         | 1.00, 1.06 | 1.08       | 1.01, 1.17 |
| Hemorrhagic stroke             | 0.97         | 0.86, 1.09 | 0.89       | 0.71, 1.12 | 0.92         | 0.86, 0.98 | 0.87       | 0.77, 0.99 |
| Total CVD                      | 1.04         | 1.01, 1.08 | 1.12       | 1.02, 1.24 | 1.03         | 1.01, 1.05 | 1.09       | 1.02, 1.17 |
| Total CVD with CABG and PCI    | 1.05         | 1.02, 1.08 | 1.12       | 1.03, 1.23 | 1.04         | 1.02, 1.05 | 1.10       | 1.03, 1.18 |
| Heart Failure                  | 1.03         | 0.97, 1.11 | 1.19       | 0.98, 1.45 | 1.04         | 1.00, 1.08 | 1.21       | 1.01, 1.43 |

Abbreviations: CABG, coronary artery bypass graft; CHD, coronary heart disease; CI, confidence interval; CVD, cardiovascular disease; DM-C, dietary modification trial comparison group; HR, hazard ratio; MI = myocardial infarction; PCI = percutaneous coronary intervention; OS, observational study

<sup>a</sup>Baseline defined as 1 year following enrollment in the Dietary Modification Trial Comparison Group, and enrollment in the Observational study
